# Supplementary material for: Overexpression of Stathmin 1 Predicts Poor Prognosis and Promotes Cancer Cell Proliferation and Migration in Ovarian Cancer
Source: Hindawi journal article supplement (doi:10.1155/2022/3554100), 2022-02-09
Supplement: f1 [file 3554100.f1.zip]

| Gene Symbol | Gene ID     | PCC  |
|-------------|-------------|------|
| HMGN2       | ENSG0000001 | 0.69 |
| TUBB        | ENSG0000001 | 0.68 |
| MARCKSL1    | ENSG0000001 | 0.66 |
| HMGN2P5     | ENSG0000002 | 0.65 |
| GIN51       | ENSG0000001 | 0.63 |
| UBE2T       | ENSG0000000 | 0.63 |
| PRTFDC1     | ENSG0000000 | 0.61 |
| SRSF12      | ENSG0000001 | 0.61 |
| RFC4        | ENSG0000001 | 0.61 |
| KIF15       | ENSG0000001 | 0.61 |
| PCNA        | ENSG0000001 | 0.61 |
| FBXO5       | ENSG0000001 | 0.61 |
| AURKB       | ENSG0000001 | 0.61 |
| MAD2L2      | ENSG0000001 | 0.61 |
| GMNN        | ENSG0000001 | 0.61 |
| PSMC3IP     | ENSG0000001 | 0.6  |
| NCAPG       | ENSG0000001 | 0.6  |
| DLGAP5      | ENSG0000001 | 0.6  |
| SUV39H2     | ENSG0000001 | 0.6  |
| SKP2        | ENSG0000001 | 0.6  |
| SRSF7       | ENSG0000001 | 0.6  |
| TMEFF1      | ENSG0000002 | 0.6  |
| CENPA       | ENSG0000001 | 0.6  |
| KLHL23      | ENSG0000002 | 0.6  |
| CENPH       | ENSG0000001 | 0.6  |
| TMSB15B     | ENSG0000001 | 0.6  |
| DSN1        | ENSG0000001 | 0.59 |
| RP11-722G7  | ENSG0000002 | 0.59 |
| CDC25A      | ENSG0000001 | 0.59 |
| DNAJC8      | ENSG0000001 | 0.59 |
| TMSB15A     | ENSG0000001 | 0.59 |
| TIMELESS    | ENSG0000001 | 0.59 |
| CENPO       | ENSG0000001 | 0.59 |
| MSANTD3-TI  | ENSG0000002 | 0.59 |
| EXO1        | ENSG0000001 | 0.59 |
| TTK         | ENSG0000001 | 0.59 |
| TPX2        | ENSG0000000 | 0.59 |
| NCAPH       | ENSG0000001 | 0.58 |
| CDC7        | ENSG0000000 | 0.58 |
| FANCL       | ENSG0000001 | 0.58 |
| CCNF        | ENSG0000001 | 0.58 |
| PAFAH1B3    | ENSG0000000 | 0.58 |
| HMGB2       | ENSG0000001 | 0.58 |
| MCM2        | ENSG0000000 | 0.57 |
| KIFC1       | ENSG0000002 | 0.57 |
| CHEK1       | ENSG0000001 | 0.57 |
| HDAC2       | ENSG0000001 | 0.57 |
| AADAT       | ENSG0000001 | 0.57 |
| ACTL6A      | ENSG0000001 | 0.57 |
| USP39       | ENSG0000001 | 0.57 |
