# Supplementary figures and images for: Overexpression of Stathmin 1 Predicts Poor Prognosis and Promotes Cancer Cell Proliferation and Migration in Ovarian Cancer
Source: Hindawi journal article supplement (doi:10.1155/2022/3554100), 2022-02-09

**A****SKOV3**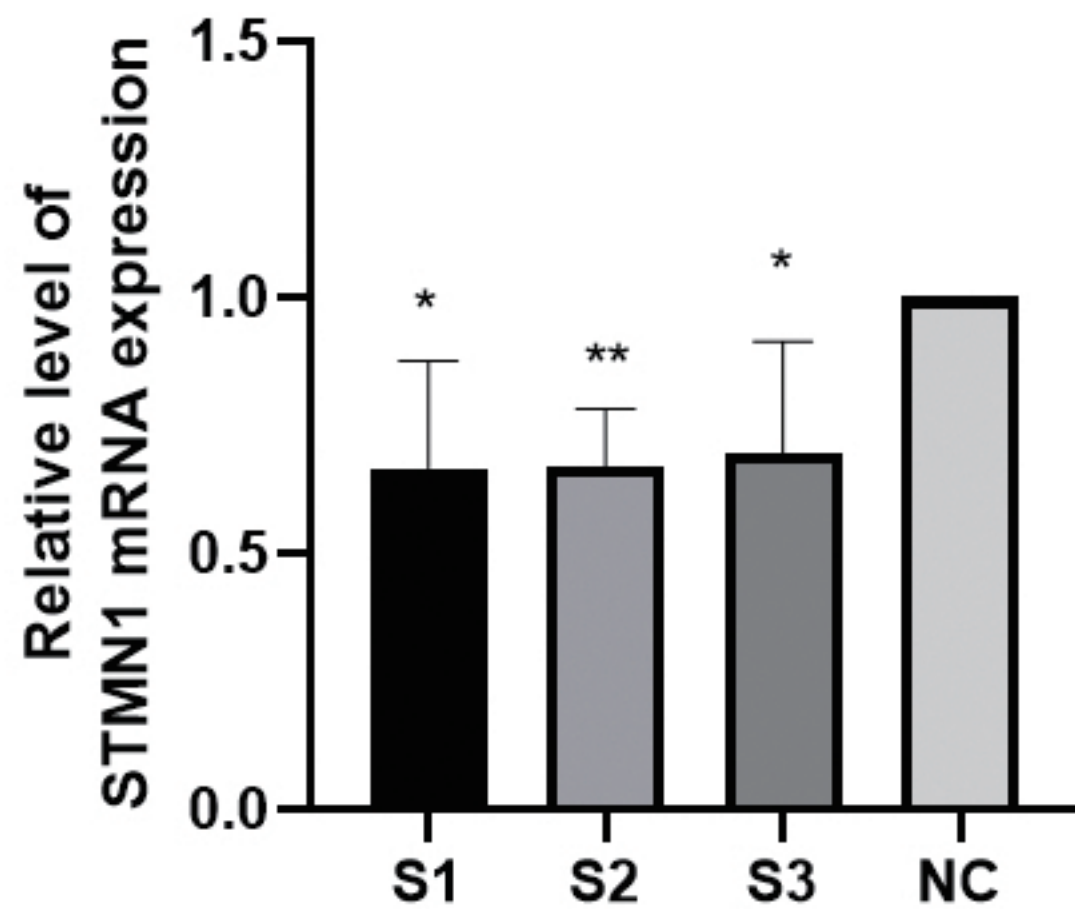**B****A2780**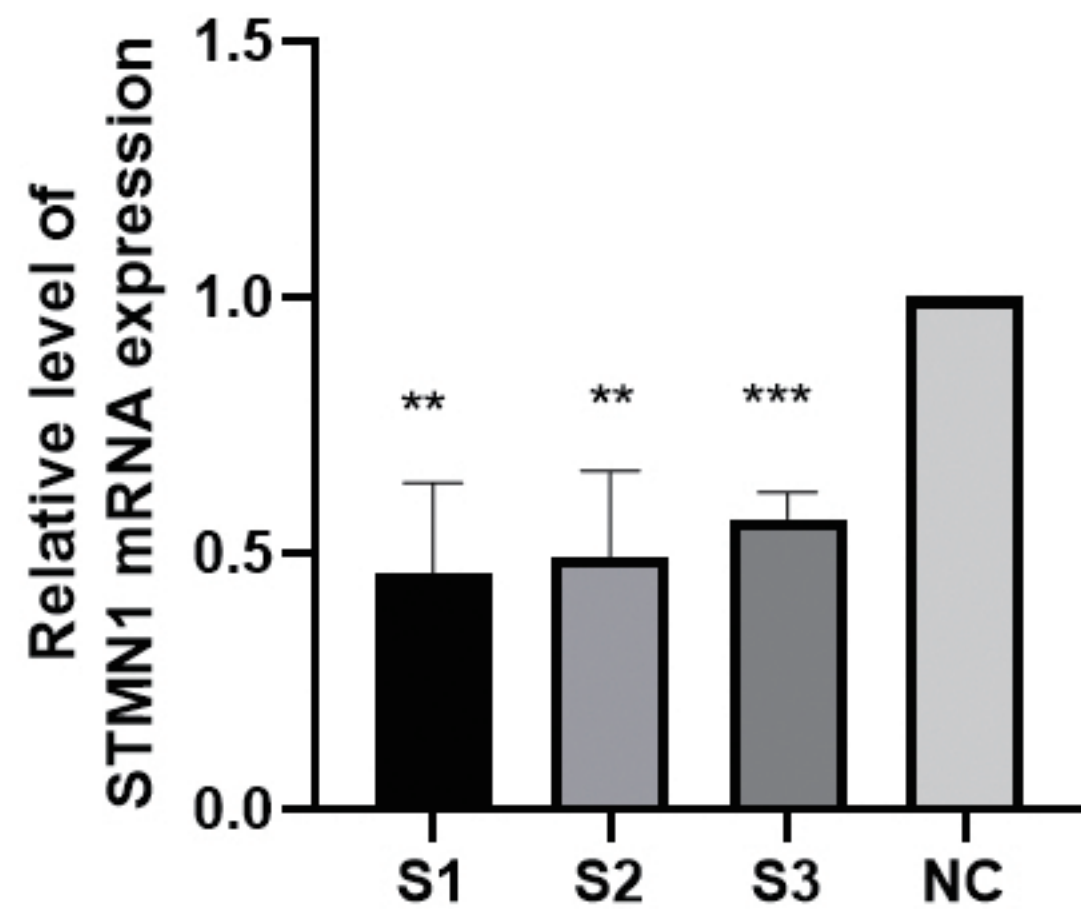

Supplement: f1 [file 3554100.f1.zip]
